# Supplementary material
Source: publisher figshare collection journal article supplement (https://gsajournals.figshare.com/ndownloader/files/24973193)
Supplement: Supplementary file 1 [file 24973193]

## Sheet: Heritability
Traits	Broad-sense H²
F.Weight	0.85
Hue.g	0.90
Ethylene	0.82
RI	0.90
Sucrose	0.56
Glucose	0.92
Fructose	0.89
TA	0.82
Citric.A.	0.86
Malic.A.	0.79
